# Supplementary material
Source: Springer Nature journal article supplement (http://www.springermedizin.de/resource/supplementary/12935_2008_225_MOESM1_ESM.pdf/9541354)

**A.**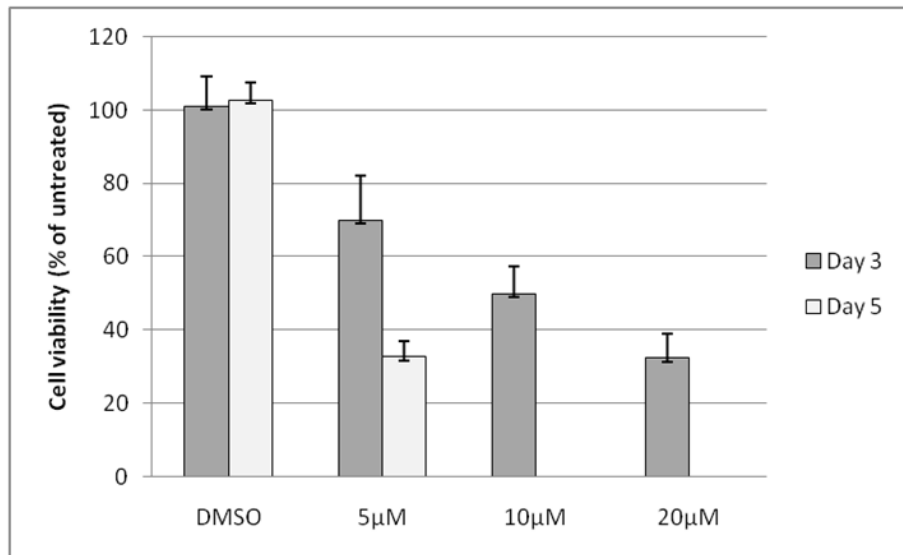**B.**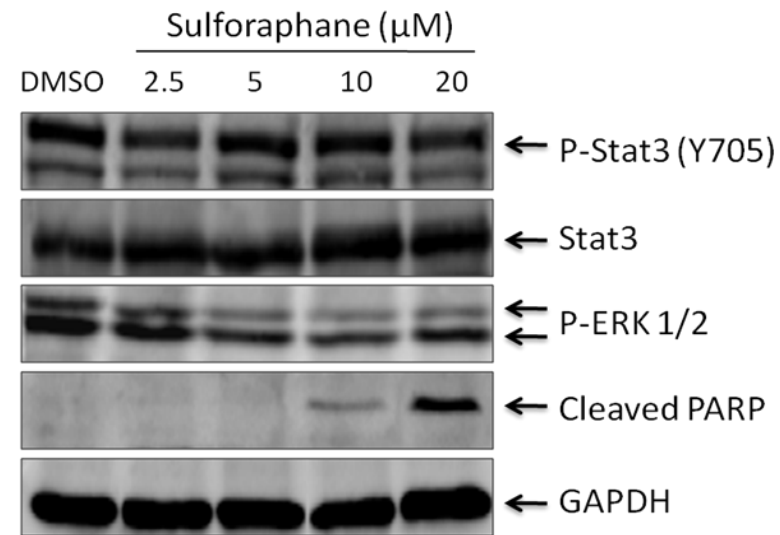**C.**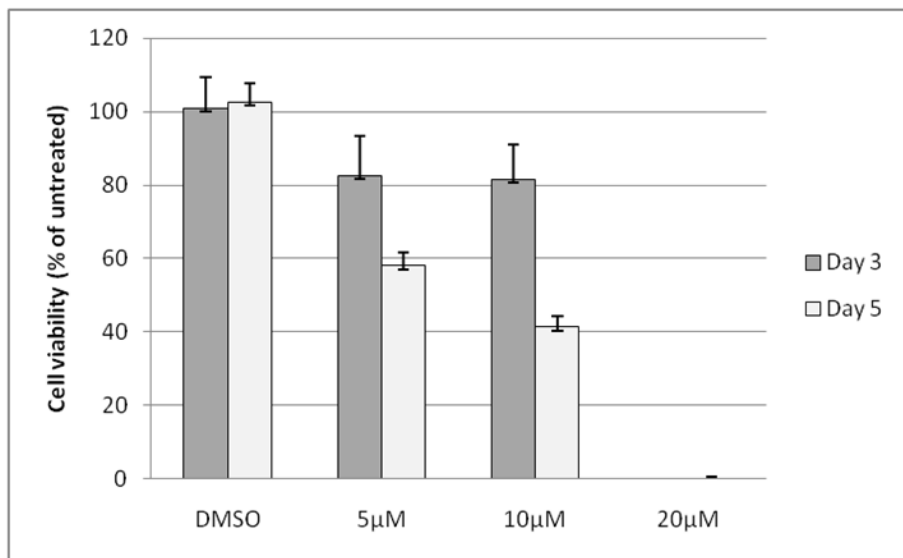**D.**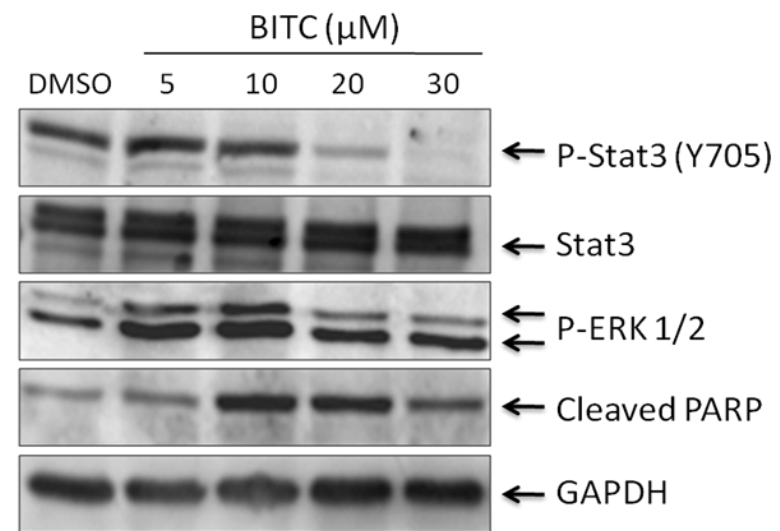

Supplement: MOESM1 [file 9541354]
